# Supplementary material for: Expression characteristic, immune signature, and prognosis value of EFNA family identified by multi-omics integrative analysis in pan-cancer
Source: Springer Nature journal article supplement (doi:10.1186/s12885-022-09951-0), 2022-08-10

Supplementary Files

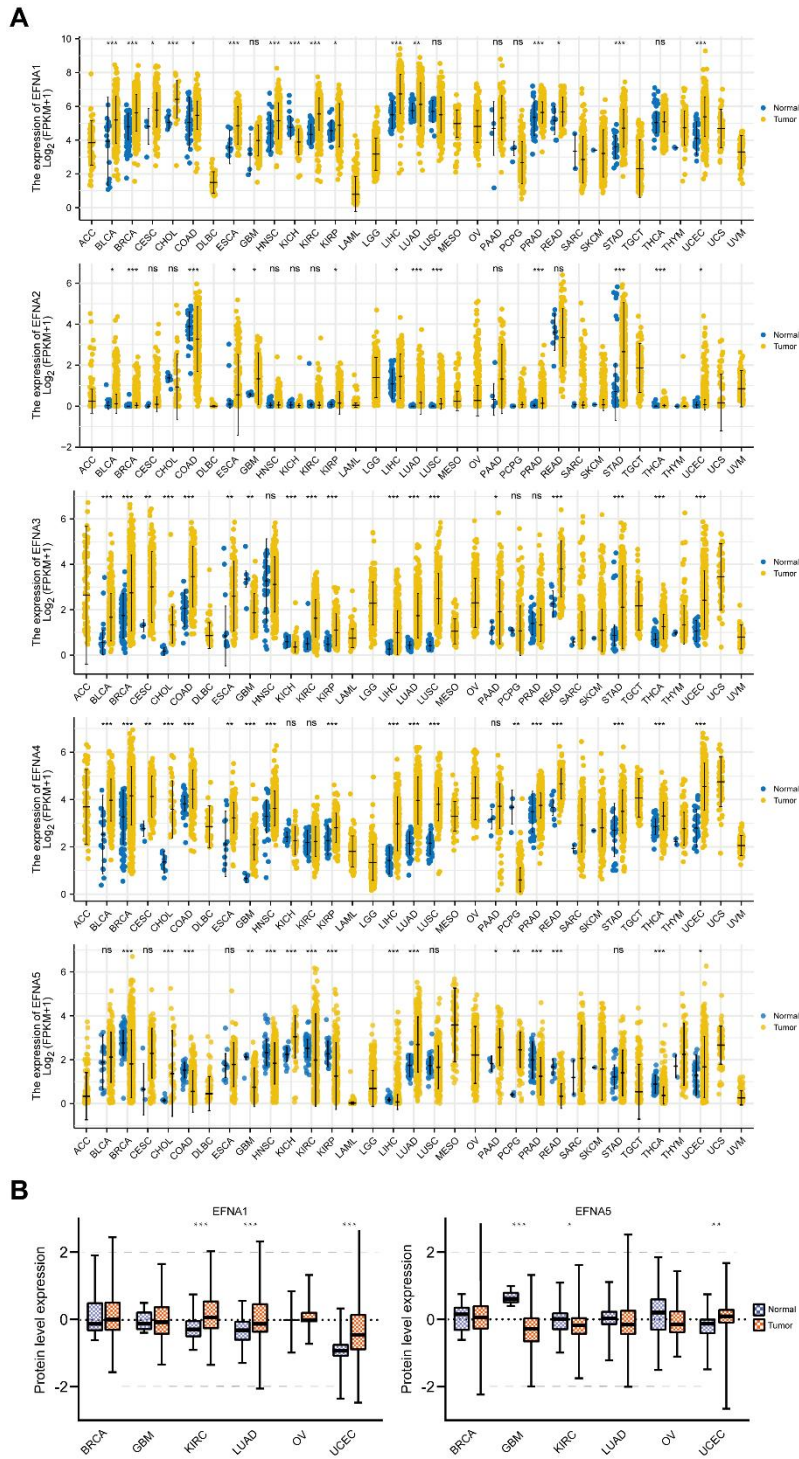

**Fig. S1** Expression of EFNA family in tumor and normal tissues **(A)** The mRNA expression of EFNAs was evaluated across 33 cancers from TCGA. **(B)** The protein expression of EFNA1 and EFNA5 was evaluated from CPTAC. \* $p < 0.05$ , \*\* $p < 0.01$ , \*\*\* $p < 0.001$ .

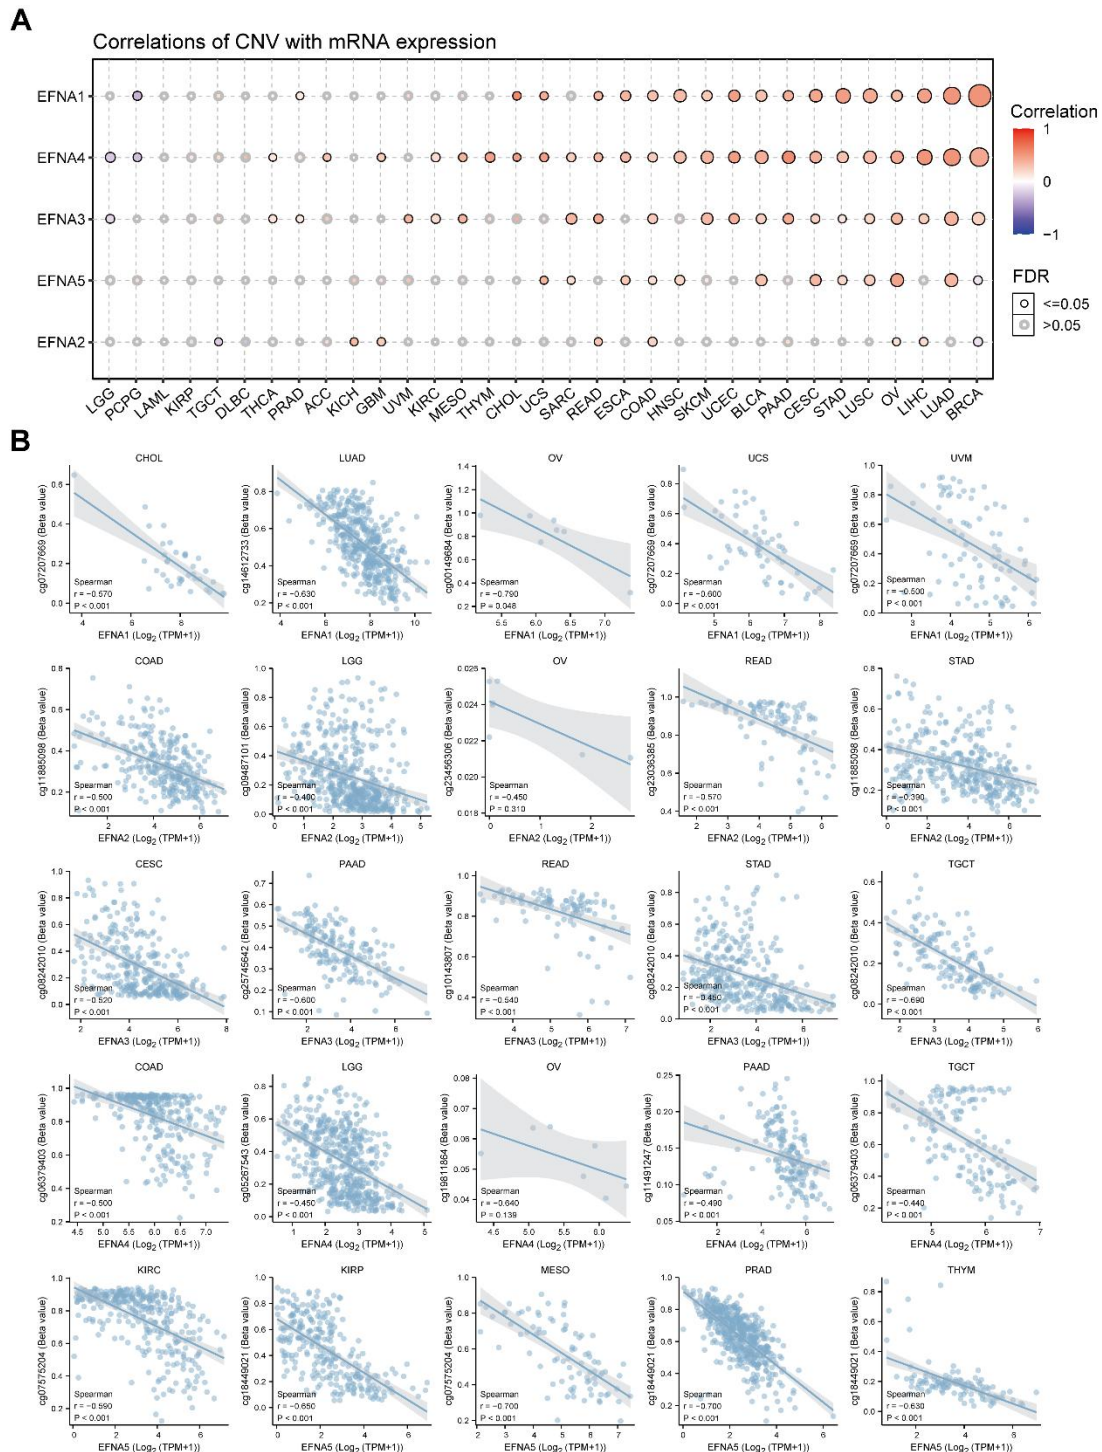

**Fig. S2** CNA and DNA methylation of EFNA family in human cancers. **(A)** The correlation between EFNAs mRNA expression and CNV from TCGA. **(B)** The top 5 negative correlation between EFNAs mRNA expression and DNA methylation was demonstrated by TCGA.

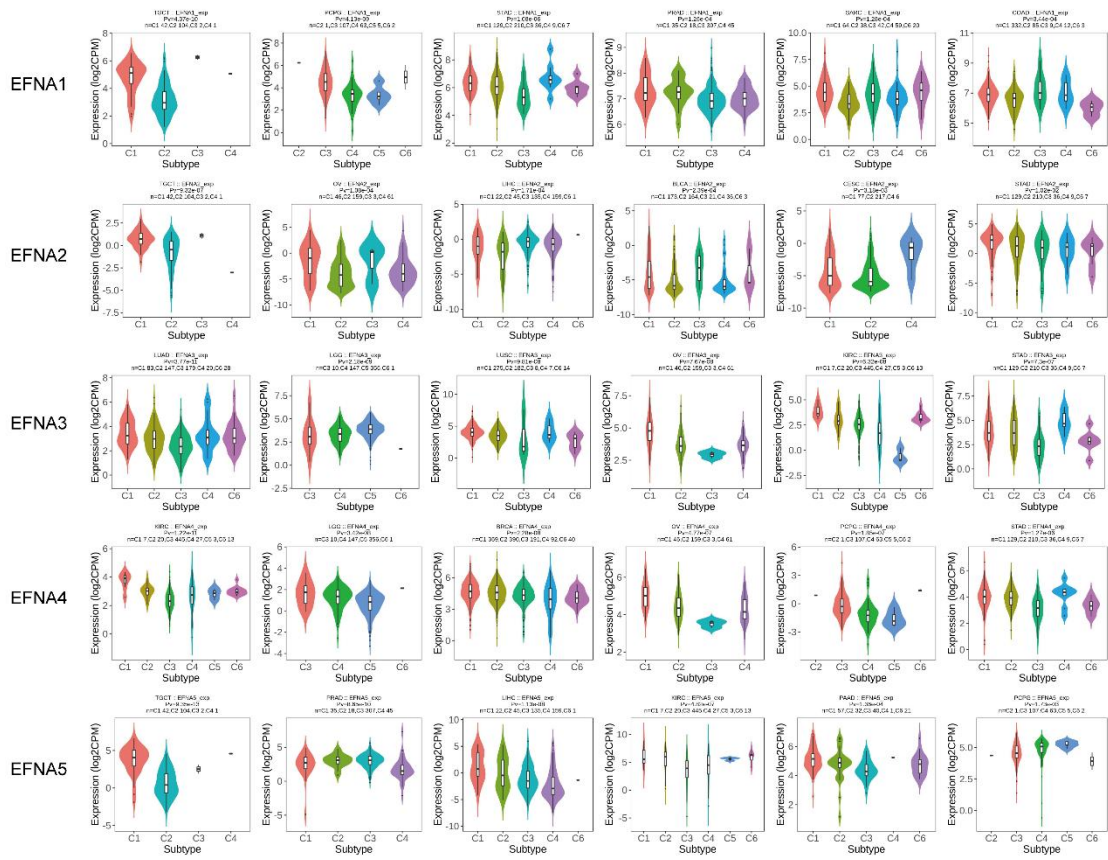

**Fig. S3** EFNA mRNA expression in different immune subtypes through TISIDB. Showing the five most statistically significant cancer types for each gene.

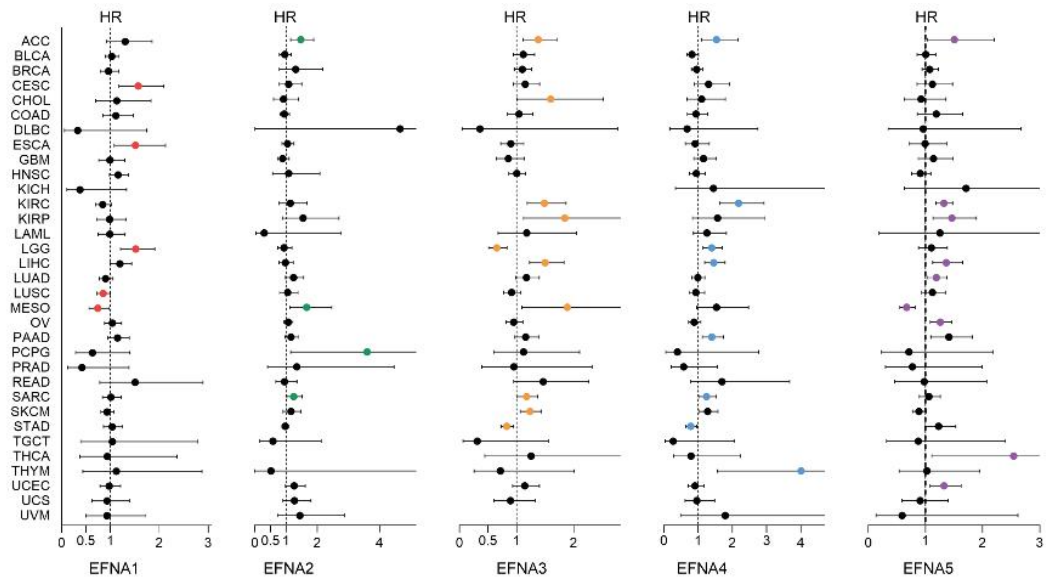

**Fig. S4** Overall survival prognosis forest map of EFNA family genes in TCGA. The prominently colored labels indicated  $p < 0.05$ .

**Table S1.** The relation between EFNA5 expression and clinical characteristics in LUAD in TMA

| Characteristics                      | EFNA5-High | EFNA5-Low  | P     |
|--------------------------------------|------------|------------|-------|
| n                                    | 53         | 39         |       |
| T stage, n (%)                       |            |            | 0.309 |
| T1-T2                                | 31 (39.2%) | 29 (36.7%) |       |
| T3-T4                                | 13 (16.5%) | 6 (7.6%)   |       |
| N stage, n (%)                       |            |            | 0.841 |
| N0                                   | 19 (27.1%) | 15 (21.4%) |       |
| N1-N3                                | 22 (31.4%) | 14 (20%)   |       |
| Pathologic stage, n (%)              |            |            | 1.000 |
| I-II                                 | 24 (38.7%) | 17 (27.4%) |       |
| III-IV                               | 12 (19.4%) | 9 (14.5%)  |       |
| Gender, n (%)                        |            |            | 0.635 |
| Female                               | 22 (23.9%) | 19 (20.7%) |       |
| Male                                 | 31 (33.7%) | 20 (21.7%) |       |
| Age, n (%)                           |            |            | 0.218 |
| ≤ 65                                 | 30 (32.6%) | 27 (29.3%) |       |
| > 65                                 | 23 (25.0%) | 12 (13.0%) |       |
| Anatomic neoplasm subdivision, n (%) |            |            | 0.334 |
| Left                                 | 21 (23.6%) | 11 (12.4%) |       |
| Right                                | 30 (33.7%) | 27 (30.3%) |       |

**Table S2.** Univariate and multivariate analyses of overall survival in patients with LUAD in TMA

| Characteristics                                      | Total(N) | Univariate analysis   |              | Multivariate analysis |              |
|------------------------------------------------------|----------|-----------------------|--------------|-----------------------|--------------|
|                                                      |          | Hazard ratio (95% CI) | P value      | Hazard ratio (95% CI) | P value      |
| Pathologic stage<br>(Stage III&IV vs.<br>Stage I&II) | 62       | 3.096 (1.500-5.991)   | <b>0.001</b> | 3.044 (1.578-5.874)   | <b>0.001</b> |
| Gender<br>(Male vs. Female)                          | 92       | 1.030 (0.782-1.356)   | 0.836        |                       |              |
| Age<br>(>65 vs. ≤ 65)                                | 92       | 1.541 (0.884-2.687)   | 0.127        |                       |              |
| Anatomic neoplasm<br>subdivision<br>(Right vs. Left) | 89       | 1.018 (0.565-1.833)   | 0.953        |                       |              |
| EFNA5<br>(High vs. Low)                              | 92       | 2.399 (1.317-4.369)   | <b>0.004</b> | 1.408 (1.006-1.971)   | <b>0.046</b> |

Primer sequences of EFNA5 are as follows:

---

|         |                       |
|---------|-----------------------|
| GAPDH-F | CACCCACTCCACCTTTGA    |
| GAPDH-R | ACCACCCTGTTGCTGTAGCCA |
| EFNA5-F | GAGGACTCCGTCCCAGAAGAT |
| EFNA5-R | TTGGAGAGTGAGGCCGGTTA  |

---

Figure 8B. The full blots with membrane edges. (Multiple exposure images)

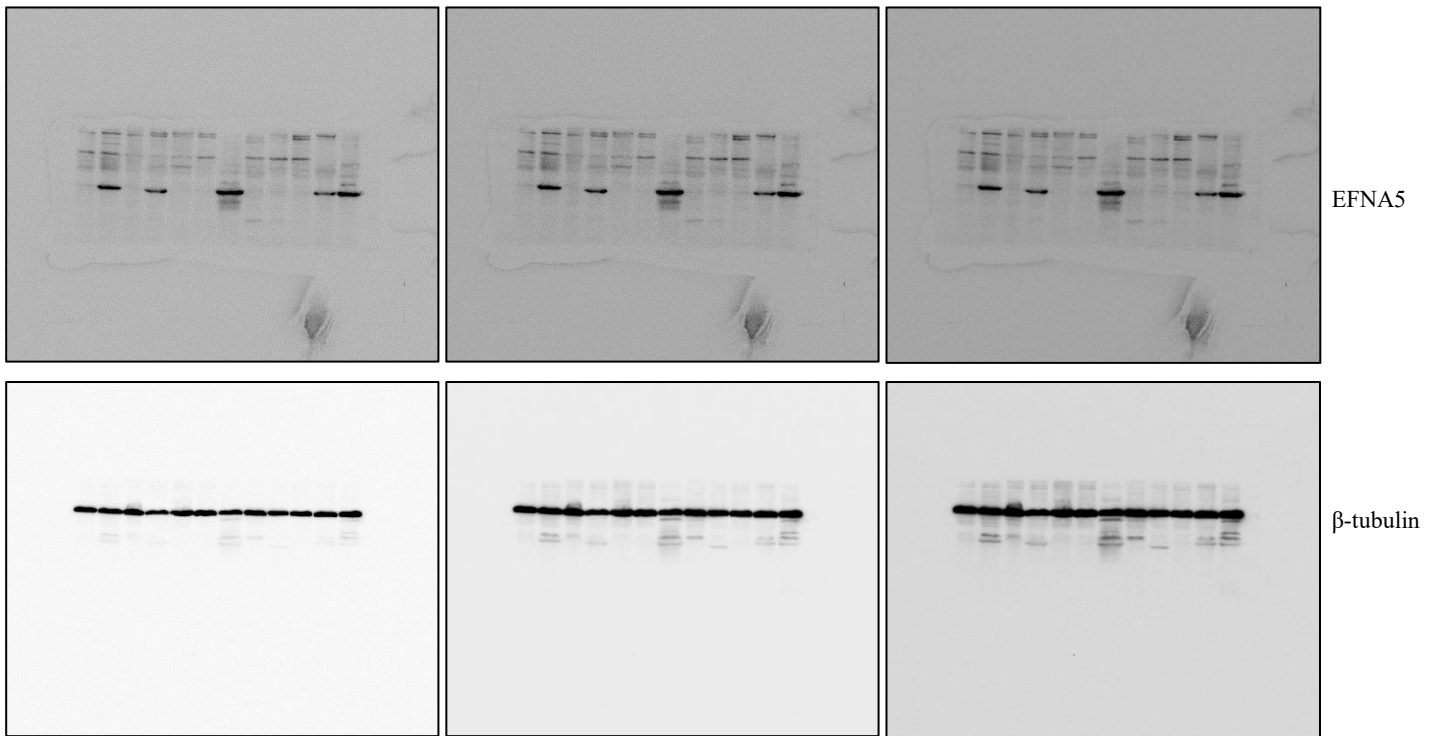

Supplement: MOESM1 [file 12885_2022_9951_MOESM1_ESM.pdf]
